# Supplementary material
Source: ML conference proceedings conference paper supplement (https://openaccess.thecvf.com/content/WACV2021/html/Chawla_Data-Free_Knowledge_Distillation_WACV_2021_paper.html)
Supplement: Supplementary file 1 [file Chawla_Data-Free_Knowledge_Distillation_WACV_2021_supplemental.pdf]

# Data-free Knowledge Distillation for Object Detection (Supplementary Material)

Akshay Chawla, Hongxu Yin, Pavlo Molchanov and Jose Alvarez  
NVIDIA  
Santa Clara, CA

akshaych@alumni.cmu.edu, {dannyy, pmolchanov, josea}@nvidia.com

## 1. Hyperparameters for DIODE

Table 1 provides the hyper parameters used for DIODE inversion of Yolo-V3 detector pre-trained on MS-COCO dataset.

| Hyperparameter                  | value                                        |
|---------------------------------|----------------------------------------------|
| $\Phi$                          | Yolo-V3                                      |
| $\Phi_{stu}$                    | Yolo-V3                                      |
| $\Phi_{verif}$                  | Yolo-V3-Tiny                                 |
| Dataset of $\Phi, \Phi_{verif}$ | MS-COCO                                      |
| N (batchsize)                   | 256 $\rightarrow$ 96 $\rightarrow$ 48        |
| Resolution (H=W)                | 160 $\rightarrow$ 320 $\rightarrow$ 416      |
| optimizer family                | Adam(lr, $\beta_1 = 0, \beta_2 = 0$ )        |
| optimizer lr                    | 0.2 $\rightarrow$ 0.002 $\rightarrow$ 0.0002 |
| scheduler                       | cosine decay w/ warmup                       |
| iterations                      | 2500 $\rightarrow$ 1500 $\rightarrow$ 1000   |
| $\alpha_{TV}$                   | 75.0                                         |
| $\alpha_{BN}$                   | 0.1                                          |
| $\alpha_{l2}$                   | 1e-7                                         |

Table 1: Hyperparameters for using DIODE to invert an off-the-shelf Yolo-V3 detector pre-trained on MS-COCO. Multiple hyperparameters in a row represent values used for multi-resolution synthesis on dimensions 160  $\rightarrow$  320  $\rightarrow$  416.

## 2. Hyperparameters for $Y_{fp}$ sampling

False positive sampling ( $Y_{fp}$  sampling) is an approach to aggregate semantically relevant false positive objects that appear with high confidence during the DIODE optimization process as described in section 3.1 in main paper. Its hyperparameters are listed in Table 2. In order to stabilize the process, we have a warmup period where no predictions are aggregated. Early exit when the image has stabilised and no more objects are appearing with high confidence. Predictions with a confidence greater than "min confidence" that have less than "overlap IoU" with an existing target are considered false positives and added to targets. We also filter out very small (area  $\leq$  Min area) and very large (area  $\geq$  Max area) predictions.

| Hyperparameter   | value |
|------------------|-------|
| Warmup           | 800   |
| Total iterations | 4000  |
| Early exit       | 2800  |
| Min confidence   | 0.2   |
| Overlap IoU      | 0.35  |
| Min area         | 1%    |
| Max area         | 85%   |

Table 2: Hyperparameters for  $Y_{fp}$  sampling for DIODE on Yolo-V3 object detector pre-trained on MS-COCO.

## 3. Hyperparameters for Knowledge Distillation

Table 3 provides hyper parameters used for distilling student detector from teacher detector.

| Hyperparameter | value                                          |
|----------------|------------------------------------------------|
| $\Phi$         | Yolo-V3                                        |
| $\Phi_{stu}$   | Yolo-V3                                        |
| batchsize      | 64                                             |
| Image size     | training: 416, eval: 640                       |
| optimizer      | Adam(0.001, $\beta_1 = 0.9, \beta_2 = 0.999$ ) |
| scheduler      | Cosine decay w/ warm up                        |
| iterations     | 500k                                           |

Table 3: Hyperparameters for mimic learning knowledge distillation on Yolo-V3.
